# Supplementary material for: Unexpected reproductive fidelity in a polygynous frog
Source: PubMed Central journal article supplement — Sci Adv. 2020 Aug 12;6(33):eaay1539. doi: 10.1126/sciadv.aay1539 (PMC7423391; doi:10.1126/sciadv.aay1539), 2020-08-12
Supplement: aay1539_SM.pdf [file aay1539_SM.pdf]

[advances.sciencemag.org/cgi/content/full/6/33/eaay1539/DC1](https://advances.sciencemag.org/cgi/content/full/6/33/eaay1539/DC1)

## Supplementary Materials for

### **Unexpected reproductive fidelity in a polygynous frog**

Fábio P. de Sá\*, Rafael C. Consolmagno, Pavitra Muralidhar, Cinthia A. Brasileiro, Kelly R. Zamudio, Célio F. B. Haddad

\*Corresponding author. Email: [fperin.sa@gmail.com](mailto:fperin.sa@gmail.com)

Published 12 August 2020, *Sci. Adv.* **6**, eaay1539 (2020)  
DOI: [10.1126/sciadv.aay1539](https://doi.org/10.1126/sciadv.aay1539)

#### **The PDF file includes:**

Tables S1 and S2  
Fig. S1  
Legends for movies S1 to S4

#### **Other Supplementary Material for this manuscript includes the following:**

(available at [advances.sciencemag.org/cgi/content/full/6/33/eaay1539/DC1](https://advances.sciencemag.org/cgi/content/full/6/33/eaay1539/DC1))

Movies S1 to S4

## Supplementary Materials

**Table S1. Guarding, territorial, and courtship behaviors performed by *Thoropa taophora* adults.** Calls, visual displays, and attacks performed by monopolist males when protecting offspring and territories, and female calls and mating behaviors performed during courtship by monopolist males and dominant, secondary, and peripheral females. Occurrence of behaviors were video-captured in the Municipality of São Sebastião, São Paulo, Brazil, from October 2012 to February 2013.

| Guarding, territorial, and courtship behaviors | Monopolist male ( $n = 13$ ) | Dominant female ( $n = 2$ ) | Secondary female ( $n = 2$ ) | Peripheral female ( $n = 2$ ) |
|------------------------------------------------|------------------------------|-----------------------------|------------------------------|-------------------------------|
| Aggressive call                                | $n = 807$                    | -                           | -                            | -                             |
| Advertisement call                             | $n = 103$                    | -                           | -                            | -                             |
| Body-raising posture                           | $n = 105$                    | -                           | -                            | -                             |
| Jump-attack                                    | $n = 148$                    | -                           | -                            | -                             |
| Kick                                           | $n = 16$                     | -                           | -                            | -                             |
| Embrace pressing thumb thorns                  | $n = 9$                      | -                           | -                            | -                             |
| Reciprocal call                                | -                            | $n = 10$                    | $n = 0$                      | $n = 0$                       |
| Mating strategy (I)                            | -                            | $n = 35$                    | $n = 0$                      | $n = 0$                       |
| Amplexus from strategy (I)                     | -                            | $n = 35$                    | $n = 0$                      | $n = 0$                       |
| Mating strategy (II)                           | -                            | $n = 110$                   | $n = 19$                     | $n = 13$                      |
| Amplexus from strategy (II)                    | -                            | $n = 5$                     | $n = 0$                      | $n = 0$                       |
| Mating strategy (III)                          | -                            | $n = 16$                    | $n = 5$                      | $n = 5$                       |
| Chase from strategy (III)                      | -                            | $n = 14$                    | $n = 3$                      | $n = 3$                       |
| Embrace from strategy (III)                    | -                            | $n = 0$                     | $n = 2$                      | $n = 2$                       |
| Amplexus from strategy (III)                   | -                            | $n = 2$                     | $n = 0$                      | $n = 0$                       |

**Table S2. Body sizes and developmental stages for all *Thoropa taophora* larvae assigned to dominant and secondary females at each of the breeding sites sampled.** All body sizes (mm) and developmental stages of tadpoles sampled from 14 females (two per breeding seep) in the Municipality of Ubatuba, São Paulo, Brazil. Offspring assigned to each female ranged from individuals recently hatched (stage 25) to others about to metamorphose (stage 41), indicating reproductive fidelity over multiple mating bouts.

| 1 <sup>st</sup> seep |           | 2 <sup>nd</sup> seep |           | 3 <sup>rd</sup> seep |           | 4 <sup>th</sup> seep |           | 5 <sup>th</sup> seep |           | 6 <sup>th</sup> seep |           | 7 <sup>th</sup> seep |           |
|----------------------|-----------|----------------------|-----------|----------------------|-----------|----------------------|-----------|----------------------|-----------|----------------------|-----------|----------------------|-----------|
| Dominant             | Secondary |
| Stages               | Sizes     |
| 33                   | 5.52      | 25                   | 3.42      | 25                   | 3.52      | 25                   | 3         | 34                   | 7.49      | 25                   | 3.22      | 30                   | 5.76      |
| 33                   | 6.46      | 25                   | 3.73      | 25                   | 3.48      | 28                   | 5.85      | 25                   | 3.08      | 39                   | 10.51     | 25                   | 3.86      |
| 33                   | 6.84      | 25                   | 3.79      | 25                   | 3.51      | 33                   | 6.57      | 25                   | 3.08      | 40                   | 11.21     | 26                   | 4.4       |
| 34                   | 7.01      | 27                   | 3.73      | 25                   | 3.52      | 33                   | 6.08      | 25                   | 3.27      | 41                   | 11.61     | 27                   | 4.62      |
| 34                   | 7.07      | 27                   | 4.28      | 25                   | 3.54      | 34                   | 6.71      | 25                   | 3.43      | 41                   | 11.38     | 27                   | 4.7       |
| 34                   | 7.09      | 27                   | 4.73      | 25                   | 3.54      | 34                   | 6.5       | 25                   | 3.43      | 41                   | 11.08     | 27                   | 4.85      |
| 34                   | 7.5       | 28                   | 4.05      | 25                   | 3.57      | 35                   | 7.59      | 25                   | 3.48      | 27                   | 4.91      | 43                   | 10.38     |
| 34                   | 7.77      | 28                   | 4.17      | 25                   | 3.6       | 25                   | 3.49      | 27                   | 5.13      | 27                   | 5.13      | 27                   | 5.13      |
| 35                   | 7.39      | 28                   | 4.35      | 25                   | 3.72      | 25                   | 3.55      | 27                   | 5.26      | 26                   | 5.08      | 36                   | 8.67      |
| 35                   | 7.4       | 29                   | 5.04      | 26                   | 3.46      | 25                   | 3.59      | 27                   | 5.26      | 26                   | 5.14      | 36                   | 9.17      |
| 35                   | 7.64      | 30                   | 5.29      | 26                   | 3.5       | 25                   | 3.67      | 27                   | 5.65      | 26                   | 5.32      | 39                   | 9.92      |
| 35                   | 7.74      | 31                   | 5.28      | 26                   | 3.59      | 25                   | 4.1       | 28                   | 5.43      | 26                   | 5.59      | 41                   | Undet.    |
| 35                   | 7.83      | 31                   | 5.43      | 26                   | 3.7       | 26                   | 4.32      | 30                   | 5.94      | 26                   | 5.6       | 27                   | 4.06      |
| 35                   | 7.96      | 31                   | 5.69      | 27                   | 3.66      | 27                   | 4.41      | 30                   | 6.22      | 26                   | 5.93      | 27                   | 4.2       |
| 35                   | 8.25      | 31                   | 5.98      | 27                   | 5.5       | 27                   | 4.51      | 30                   | 6.76      | 27                   | 5.42      | 27                   | 4.23      |
| 36                   | 7.49      | 31                   | 6.07      | 27                   | 5.56      | 27                   | 4.8       | 30                   | 6.87      | 27                   | 5.74      | 27                   | 4.25      |
| 36                   | 8.02      | 33                   | 5.85      | 27                   | 5.62      | 27                   | 4.86      | 31                   | 7.03      | 27                   | 6         | 27                   | 4.25      |
| 36                   | 8.04      | 33                   | 5.94      | 27                   | 5.68      | 28                   | 4.85      | 31                   | 7.17      | 28                   | 6.3       | 27                   | 4.32      |
| 36                   | 8.07      | 33                   | 6.03      | 27                   | 6.45      | 28                   | 4.93      | 32                   | 6.41      | 28                   | 6.65      | 27                   | 4.33      |
| 36                   | 8.14      | 34                   | 6.3       | 28                   | 4.18      | 28                   | 5.06      | 33                   | 6.68      | 28                   | 6.7       | 27                   | 4.34      |
| 36                   | 8.19      | 34                   | 6.76      | 28                   | 5.81      | 28                   | 5.1       | 34                   | 6.68      | 29                   | 7.08      | 27                   | 4.37      |
| 36                   | 8.35      | 34                   | 6.8       | 29                   | 5.97      | 29                   | 5.17      | 34                   | 6.87      | 29                   | 7.26      | 27                   | 4.44      |
| 36                   | 8.35      | 35                   | 7.13      | 29                   | 6.38      | 29                   | 5.2       | 34                   | 7.35      | 30                   | 7.3       | 27                   | 4.51      |
| 36                   | 8.45      | 35                   | 7.12      | 29                   | 6.5       | 29                   | 5.52      | 34                   | 7.52      | 30                   | 7.41      | 27                   | 4.53      |
| 37                   | 7.84      | 30                   | 6.11      | 30                   | 6.11      | 31                   | 5.83      | 35                   | 7.19      | 31                   | 6.64      | 27                   | 4.57      |
| 37                   | 8.45      | 30                   | 6.56      | 30                   | 6.56      | 31                   | 6.16      | 35                   | 7.31      | 33                   | 7.67      | 27                   | 4.57      |
| 37                   | 8.62      | 30                   | 7.01      | 30                   | 7.01      | 33                   | 6.5       | 35                   | 7.75      | 33                   | Undet.    | 27                   | 4.57      |
| 37                   | 8.6       | 31                   | 6.12      | 31                   | 6.12      | 33                   | 6.54      | 35                   | 7.77      | 34                   | 7.84      | 27                   | 4.65      |
| 37                   | 8.84      | 32                   | 6.25      | 34                   | 6.72      | 35                   | 7.98      | 35                   | 7.98      | 35                   | 8.15      | 27                   | 4.69      |
| Undet.               | Undet.    | 32                   | 6.76      | 35                   | 7.25      | 36                   | 8.47      | 35                   | 8.18      | 27                   | 4.69      | 26                   | 4.43      |
| Undet.               | Undet.    | 33                   | 6.17      | 36                   | 7.91      | 37                   | 8.45      | 36                   | 8.95      | 27                   | 4.72      | 26                   | 4.47      |
| Undet.               | Undet.    | 33                   | 6.5       | 36                   | 8.76      | 37                   | 8.51      | 39                   | 9.14      | 27                   | 4.73      | 26                   | 4.54      |
| Undet.               | Undet.    | 33                   | 6.68      | 37                   | 8.73      | 37                   | 8.81      | 39                   | 10.22     | 27                   | 4.87      | 26                   | 4.6       |
|                      |           | 34                   | 7.15      | 37                   | 8.75      | 37                   | 9.25      | 41                   | 10.42     | 27                   | 4.87      | 26                   | 4.68      |
|                      |           | 34                   | 6.45      | 37                   | 8.75      | 37                   | Undet.    | 41                   | 10.55     | 27                   | 4.92      | 26                   | 4.72      |
|                      |           | 34                   | 7.33      | 38                   | 9.18      | 38                   | 8.03      | 41                   | 10.8      | 27                   | 4.99      | 26                   | 4.84      |
|                      |           | 34                   | 7.34      | 38                   | 9.28      | 38                   | 8.93      | 41                   | Undet.    | 28                   | 4.35      | 26                   | 4.95      |
|                      |           | 34                   | 7.45      | 38                   | 9.38      | 39                   | 9.39      | 43                   | 9.69      | 28                   | 4.52      | 26                   | 4.96      |
|                      |           | 34                   | 7.48      | 38                   | 9.47      | 39                   | 9.45      | 45                   | 9.95      | 28                   | 4.97      | 26                   | 5         |
|                      |           | 35                   | 7.14      | 38                   | 9.72      | 39                   | 9.46      | 45                   | 9.95      | 28                   | 5.72      | 26                   | 5.23      |
|                      |           | 35                   | 7.4       | 38                   | 9.72      | 39                   | 9.67      | 28                   | 5.79      | 28                   | 5.79      | 26                   | 6.04      |
|                      |           | 35                   | 7.81      | 38                   | 9.81      | 39                   | 9.74      | 28                   | 5.86      | 27                   | 4.56      | 27                   | 5.29      |
|                      |           | 35                   | 7.81      | 38                   | 10.05     | 39                   | 10.41     | 28                   | 6.34      | 27                   | 4.56      | 27                   | 5.29      |
|                      |           | 35                   | 7.82      | 38                   | 9.97      | 41                   | 9.4       | 29                   | 4.63      | 27                   | 4.63      | 27                   | 5.85      |
|                      |           | 35                   | 7.92      | 39                   | 10.05     | 41                   | 9.5       | 30                   | 5.84      | 30                   | 5.84      | 27                   | 5.94      |
|                      |           | 35                   | 8.01      | 39                   | 10.14     | 41                   | 10.01     | 31                   | 5.79      | 31                   | 5.79      | 27                   | 5.94      |
|                      |           | 35                   | 8.01      | 39                   | 10.8      | 41                   | 10.01     | 31                   | 6.55      | 31                   | 6.55      | 27                   | 5.97      |
|                      |           | 35                   | 8.01      | 39                   | 10.8      | 41                   | 10.17     | 31                   | 6.71      | 31                   | 6.71      | 27                   | 6.03      |
|                      |           | 35                   | 8.35      | 39                   | 11.43     | 41                   | 10.2      | 31                   | 7.26      | 31                   | 7.26      | 27                   | 6.19      |
|                      |           | 35                   | 8.48      | 40                   | 10.38     | 41                   | 10.42     | 32                   | 5.97      | 32                   | 5.97      | 27                   | 6.28      |
|                      |           | 36                   | 7.6       | 40                   | 10.51     | 41                   | 10.48     | 32                   | 6.35      | 32                   | 6.35      | 27                   | 6.3       |
|                      |           | 36                   | 7.78      | 40                   | 10.57     | 41                   | 10.53     | 32                   | 6.7       | 32                   | 6.7       | 27                   | 6.33      |
|                      |           | 36                   | 7.96      | 40                   | 10.66     | 41                   | 10.88     | 32                   | 7.01      | 32                   | 7.01      | 27                   | 6.37      |
|                      |           | 36                   | 7.98      | 40                   | 10.67     | 41                   | 10.88     | 33                   | 6.47      | 33                   | 6.47      | 27                   | 6.45      |
|                      |           | 36                   | 7.98      | 41                   | 11.8      | 41                   | 10.9      | 33                   | 6.69      | 33                   | 6.69      | 27                   | 6.51      |
|                      |           | 36                   | 8.12      | 41                   | 11.07     | 41                   | 11.07     | 33                   | 7.37      | 33                   | 7.37      | 27                   | 6.52      |
|                      |           | 36                   | 8.14      | 41                   | 11.28     | 41                   | 11.28     | 33                   | 7.38      | 33                   | 7.38      | 27                   | 6.52      |
|                      |           | 36                   | 8.22      | 41                   | 11.6      | 41                   | 11.6      | 33                   | 7.42      | 33                   | 7.42      | 27                   | 6.71      |
|                      |           | 36                   | 8.29      | 41                   | 11.61     | 41                   | 11.61     | 33                   | 7.74      | 33                   | 7.74      | 27                   | 6.75      |
|                      |           | 36                   | 8.29      | 41                   | 11.61     | Undet.               | Undet.    | 34                   | 6.86      | 34                   | 6.86      | 27                   | Undet.    |
|                      |           | 36                   | 8.34      | 41                   | 11.61     | Undet.               | Undet.    | 34                   | 7.13      | 34                   | 7.13      | 28                   | 6.51      |
|                      |           | 36                   | 8.54      | 41                   | 11.61     | Undet.               | Undet.    | 34                   | 7.42      | 34                   | 7.42      | 28                   | 6.88      |
|                      |           | 36                   | 8.58      | 41                   | 11.61     | Undet.               | Undet.    | 34                   | 7.53      | 34                   | 7.53      | 28                   | 7         |
|                      |           | 36                   | 8.66      | 41                   | 11.61     | Undet.               | Undet.    | 34                   | 7.76      | 34                   | 7.76      | 28                   | 7         |
|                      |           | 36                   | 8.87      | 41                   | 11.61     | Undet.               | Undet.    | 34                   | 7.8       | 34                   | 7.8       | 29                   | 6.64      |
|                      |           | 37                   | 9.04      | 41                   | 11.61     | Undet.               | Undet.    | 34                   | 7.81      | 34                   | 7.81      | 29                   | 6.81      |
|                      |           | 37                   | 9.11      | 41                   | 11.61     | Undet.               | Undet.    | 34                   | 7.89      | 34                   | 7.89      | 29                   | 7.24      |
|                      |           | 38                   | 8.98      | 41                   | 11.61     | Undet.               | Undet.    | 35                   | 7.48      | 35                   | 7.48      | 30                   | 6.76      |
|                      |           | 38                   | 9.18      | 41                   | 11.61     | Undet.               | Undet.    | 35                   | 7.72      | 35                   | 7.72      | 30                   | 6.79      |
|                      |           | 38                   | 9.71      | 41                   | 11.61     | Undet.               | Undet.    | 35                   | 7.84      | 35                   | 7.84      | 30                   | 7.35      |
|                      |           | 38                   | 9.86      | 41                   | 11.61     | Undet.               | Undet.    | 35                   | 8.03      | 35                   | 8.03      | 30                   | 7.37      |
|                      |           | 39                   | 10.19     | 41                   | 11.61     | Undet.               | Undet.    | 35                   | 8.07      | 35                   | 8.07      | 31                   | 7.18      |
|                      |           | 39                   | 10.26     | 41                   | 11.61     | Undet.               | Undet.    | 35                   | 8.19      | 35                   | 8.19      | 31                   | 7.34      |
|                      |           | 39                   | 10.36     | 41                   | 11.61     | Undet.               | Undet.    | 35                   | 8.69      | 35                   | 8.69      | 31                   | 7.68      |
|                      |           | 39                   | 10.54     | 41                   | 11.61     | Undet.               | Undet.    | 36                   | 8.19      | 36                   | 8.19      | 32                   | 7.42      |
|                      |           | 39                   | 9.1       | 41                   | 11.61     | Undet.               | Undet.    | 36                   | 8.26      | 36                   | 8.26      | 32                   | Undet.    |
|                      |           | 39                   | 9.18      | 41                   | 11.61     | Undet.               | Undet.    | 36                   | 8.34      | 36                   | 8.34      | 35                   | 7.95      |
|                      |           | 39                   | 9.45      | 41                   | 11.61     | Undet.               | Undet.    | 36                   | 8.74      | 36                   | 8.74      | 36                   | 8.61      |
|                      |           | 39                   | 9.49      | 41                   | 11.61     | Undet.               | Undet.    | 36                   | 8         | 36                   | 8         | 39                   | 9.51      |
|                      |           | 39                   | 9.9       | 41                   | 11.61     | Undet.               | Undet.    | 36                   | 8.82      | 36                   | 8.82      | 39                   | 8.62      |
|                      |           | 40                   | 10.12     | 41                   | 11.61     | Undet.               | Undet.    | 36                   | 8.86      | 36                   | 8.86      | 40                   | 9.93      |
|                      |           | 40                   | 10.68     | 41                   | 11.61     | Undet.               | Undet.    | 36                   | 8.9       | 36                   | 8.9       | 40                   | 10.68     |
|                      |           | 40                   | 10.71     | 41                   | 11.61     | Undet.               | Undet.    | 36                   | 9.06      | 36                   | 9.06      | 40                   | 10.71     |
|                      |           | 40                   | 11.01     | 41                   | 11.61     | Undet.               | Undet.    | 36                   | 9.1       | 36                   | 9.1       | 40                   | 11.01     |
|                      |           | 40                   | 11.31     | 41                   | 11.61     | Undet.               | Undet.    | 36                   | 9.17      | 36                   | 9.17      | 40                   | 11.31     |
|                      |           | 40                   | 11.79     | 41                   | 11.61     | Undet.               | Undet.    | 36                   | 9.31      | 36                   | 9.31      | 40                   | 11.79     |
|                      |           | 40                   | 9.69      | 41                   | 11.61     | Undet.               | Undet.    | 36                   | 9.32      | 36                   | 9.32      | 40                   | 9.69      |
|                      |           | 40                   | 9.99      | 41                   | 11.61     | Undet.               | Undet.    | 36                   | 9.53      | 36                   | 9.53      | 40                   | 9.99      |
|                      |           | 41                   | 10.21     | 41                   | 11.61     | Undet.               | Undet.    | 37                   | 8.41      | 37                   | 8.41      | 41                   | 10.21     |
|                      |           | 41                   | 10.34     | 41                   | 11.61     | Undet.               | Undet.    | 37                   | 8.51      | 37                   | 8.51      | 41                   | 10.34     |
|                      |           | 41                   | 10.51     | 41                   | 11.61     | Undet.               | Undet.    | 37                   | 8.9       | 37                   | 8.9       | 41                   | 10.51     |
|                      |           | 41                   | 10.95     | 41                   | 11.61     | Undet.               | Undet.    | 37                   | 9.12      | 37                   | 9.12      | 41                   | 10.95     |
|                      |           | 41                   | 10.99     | 41                   | 11.61     | Undet.               | Undet.    | 37                   | 9.55      | 37                   | 9.55      | 41                   | 10.99     |
|                      |           | 41                   | 11.45     | 41                   | 11.61     | Undet.               | Undet.    | 37                   | 9.77      | 37                   | 9.77      | 41                   | 11.45     |
|                      |           | Undet.               | Undet.    | 38                   | 8.92      | 38                   | 8.92      | 38                   | 8.92      | 38                   | 8.92      | 38                   | 8.92      |
|                      |           | Undet.               | Undet.    | 38                   | 9.24      | 38                   | 9.24      | 38                   | 9.24      | 38                   | 9.24      | 38                   | 9.24      |
|                      |           | Undet.               | Undet.    | 38                   | 9.49      | 38                   | 9.49      | 38                   | 9.49      | 38                   | 9.49      | 38                   | 9.49      |
|                      |           | Undet.               | Undet.    | 38                   | 9.55      | 38                   | 9.55      | 38                   | 9.55      | 38                   | 9.55      | 38                   | 9.55      |
|                      |           | Undet.               | Undet.    | 38                   | 9.71      | 38                   | 9.71      | 38                   | 9.71      | 38                   | 9.71      | 38                   | 9.71      |
|                      |           | Undet.               | Undet.    | 38                   | 9.78      | 38                   | 9.78      | 38                   | 9.78      | 38                   | 9.78      | 38                   | 9.78      |
|                      |           | Undet.               | Undet.    | 38                   | 9.81      | 38                   | 9.81      | 38                   | 9.81      | 38                   | 9.81      | 38                   | 9.81      |
|                      |           | Undet.               | Undet.    | 38                   | 10.09     | 38                   | 10.09     | 38                   | 10.09     | 38                   | 10.09     | 38                   | 10.09     |
|                      |           | Undet.               | Undet.    | 39                   | 9.77      | 39                   | 9.77      | 39                   | 9.77      | 39                   | 9.77      | 39                   | 9.77      |
|                      |           | Undet.               | Undet.    | 39                   | 9.83      | 39                   | 9.83      | 39                   | 9.83      | 39                   | 9.83      | 39                   | 9.83      |
|                      |           | Undet.               | Undet.    | 39                   | 9.87      | 39                   | 9.87      | 39                   | 9.87      | 39                   | 9.87      | 39                   | 9.87      |
|                      |           | Undet.               | Undet.    | 39                   | 10.07     | 39                   | 10.07     | 39                   | 10.07     | 39                   | 10.07     | 39                   | 10.07     |
|                      |           | Undet.               | Undet.    | 39                   | 10.4      | 39                   | 10.4      | 39                   | 10.4      | 39                   | 10.4      | 39                   | 10.4      |
|                      |           | Undet.               | Undet.    | 39                   | 10.46     | 39                   | 10.46     | 39                   | 10.46     | 39                   | 10.46     | 39                   | 10.46     |
|                      |           |                      |           |                      |           |                      |           |                      |           |                      |           |                      |           |

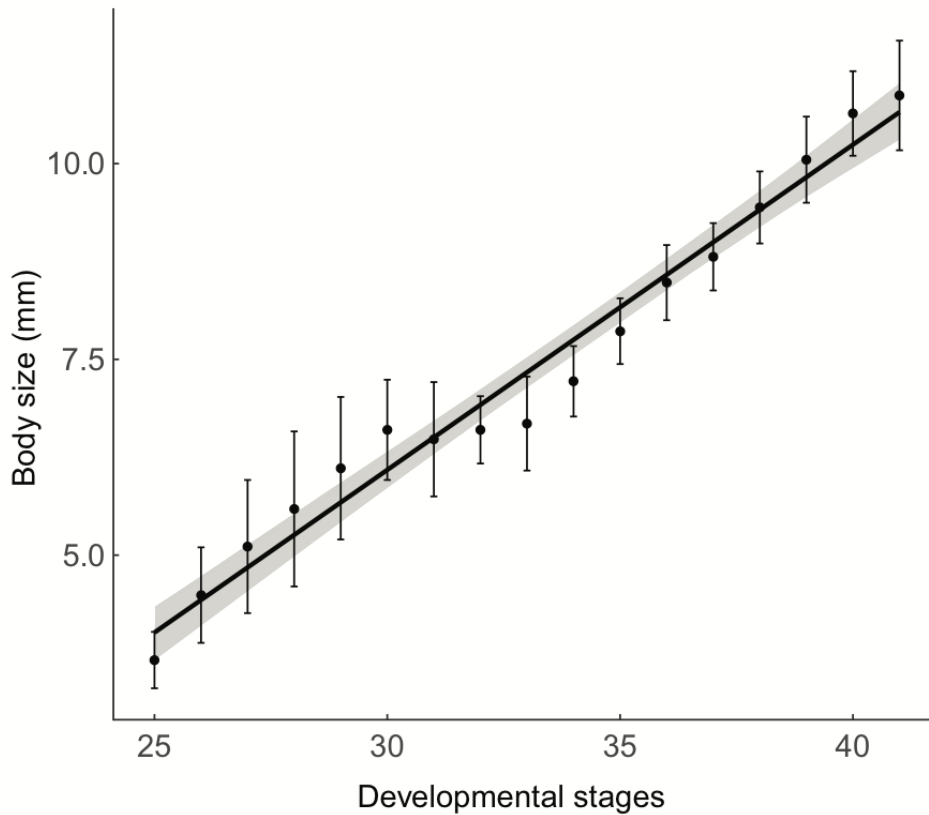

**Fig. S1. Significant positive correlation between body size and developmental stage in *Thoropa taophora* larvae ( $r = 0.965$ ,  $P < 0.001$ ,  $n = 553$ ).** Tadpoles mothered by each female in the breeding seep vary in larval development from recently hatched to near metamorphosis, thus indicating they belong to different clutches of the same parents, a result of reproductive fidelity over multiple mating bouts. Confidence intervals (95%) are shown in grey. Black dots reflect average of body sizes and bars reflect  $\pm$  standard error values.

## **Movies S1 to S4**

**Movies S1 and S2. Monopolist male aggressively defends his breeding seep territory.**

Monopolist males discourage intruders by emitting aggressive calls, sometimes also sparsely adding advertisement calls, and by displaying body-raising postures. They repel other conspecific males that invade a territory or that begin to cannibalize eggs with vigorous jump-attacks, kicks, and embraces that press keratinized spines on their thumbs against the intruder's body.

**Movies S3 and S4. *Thoropa taophora* is the first amphibian in which a single-male polygynous mating system with reproductive fidelity has been confirmed with molecular parentage analyses.** Monopolist males interact in courtship with two or three females at the same time, with distinct types and levels of interactions between male and each female, indicating a hierarchy among females. Females cannibalize eggs, triggering amplexus by the monopolist male.
